# Supplementary material for: Bio-mass derived functionalized graphene aerogel: a sustainable approach for the removal of multiple organic dyes and their mixtures
Source: Royal Society of Chemistry journal article supplement (doi:10.1039/d1nj00470k), 2021-01-01
Supplement: d1nj00470k1.pdf [file d1nj00470k1.pdf]

### Supporting Information

#### **Bio-Mass Derived Functionalized-Graphene-Aerogel: A Sustainable Approach for the Removal of Multiple Organic Dyes and their Mixtures**

Jaidev Kaushik,<sup>a</sup> Vishrant Kumar,<sup>b</sup> Anjali Kumari Garg,<sup>a</sup> Prashant Dubey,<sup>c</sup> Kumud Malika Tripathi<sup>d\*</sup> and Sumit Kumar Sonkar<sup>a\*</sup>

<sup>a</sup>Department of Chemistry, Malaviya National Institute of Technology Jaipur, Jaipur-302017, Rajasthan, India

<sup>b</sup> Department of Chemical Engineering, Indian Institute of Science Education and Research, Bhopal- 462066, Madhya Pradesh, India

<sup>c</sup>Centre of Material Sciences, Institute of Interdisciplinary Studies, Nehru Science Complex, University of Allahabad, Prayagraj-211002, Uttar Pradesh, India

<sup>d</sup> Department of Chemistry, Indian Institute of Petroleum and Energy, Visakhapatnam-530003, Andhra Pradesh, India

\*Corresponding author: E-mail: [sksonkar.chy@mnit.ac.in](mailto:sksonkar.chy@mnit.ac.in), [kumud20010@gmail.com](mailto:kumud20010@gmail.com)

**Table S1:** EDX elemental compositing of GA.

| <b>Element</b> | <b>Weight%</b> | <b>Atomic%</b> |
|----------------|----------------|----------------|
| <b>C K</b>     | 90.79          | 92.92          |
| <b>O K</b>     | 9.21           | 7.08           |
| <b>Total</b>   | 100.00         | 100.00         |

**Table S2:** EDX elemental compositing of f-GA.

| <b>Element</b> | <b>Weight%</b> | <b>Atomic%</b> |
|----------------|----------------|----------------|
| <b>C K</b>     | 64.11          | 70.41          |
| <b>O K</b>     | 35.89          | 29.59          |
| <b>Total</b>   | 100.00         | 100.00         |

### **Batch Adsorption Experiments**

For the kinetic and isotherm studies of dyes adsorption, 50 mL of dyes solution (CV, MB and RhB) were prepared with different concentrations (10-250) mg L<sup>-1</sup> with f-GA dosage of 0.16 mg mL<sup>-1</sup> in a 100 mL conical flask. After 2 min of sonication, the solutions were placed on a magnetic stirrer and stirred continuously for 73 min. From these solutions, 1 mL was taken out at various time intervals from (0-75) min. The concentrations of all the three dyes were estimated by applying universal Beer Lambert's Law at wavelengths corresponding to the respective maximum absorbance (589 nm for CV, 664 nm for MB, and 554 nm for RhB) spectrophotometrically using UV-Vis spectrometer. Maximum equilibrium adsorption capacity ( $q_e$ ) was calculated by using the following **Eq. S1**

$$q_e = \frac{(C_0 - C_e) \cdot V}{m} \quad (\text{S1})$$

The effect of varying concentrations (10-250) mg L<sup>-1</sup> of all the three tested dyes were investigated at a constant adsorbent (f-GA) dose of 8 mg in 50 mL dye's solutions. The effect of adsorbent doses was investigated at different adsorbent amounts, respectively (4, 8, 12, 16, 20) mg in 50 mL at constant concentration (100 mg L<sup>-1</sup>) of dyes, while other parameters were kept constant. The effect of temperature was investigated with 200 mg L<sup>-1</sup> and 8 mg 50 ml<sup>-1</sup> of f-GA loading at 293, 303, 313, and 323 K, while other parameters were constant.

The pH studies were performed by checking the adsorption capacity of f-GA at varying solution pH (dyes + f-GA) from 2 to 10 using 0.1 M HCl and 0.1 M NaOH solution with the help of a calibrated pH meter. For this purpose, 100 mg L<sup>-1</sup> dye adsorbed by 0.16 mg mL<sup>-1</sup> f-GA

loading, was separated from the solution phase via centrifugation and dried at room temperature. As the results obtained from the pH study, basic pH was chosen for desorption study. So, the dyes (CV, MB and RhB) loaded f-GA were separately immersed in 0.01 M 50 mL NaOH solution and stirred for 75 minutes. Afterward, 1 mL of these solutions were taken out at various time intervals and centrifuged for 2 minutes (10000 rpm). The same process was repeated 5 times to check the reusability. The resultant supernatant was analyzed by UV-Vis spectrophotometer and % desorption was plotted against the time.

The comparative studies of GA, AC and f-GA were performed at different dyes concentration of 50 and 100 mg L<sup>-1</sup> with the adsorbent loading of 0.16 mg mL<sup>-1</sup>. For the analysis of dyes mixture, 50 mg L<sup>-1</sup> of CV, MB and RhB was mixed and 50 mL of this mixed solution was then treated with GA and f-GA with a loading of 0.16 mg mL<sup>-1</sup>. Industrial wastewater samples were collected from the Sanganer textile industry, Jaipur, India. Then 50 mg L<sup>-1</sup> individual dyes were spiked externally in the industrial sample and 0.16 mg mL<sup>-1</sup> of GA and f-GA was supplied to it for treatment.

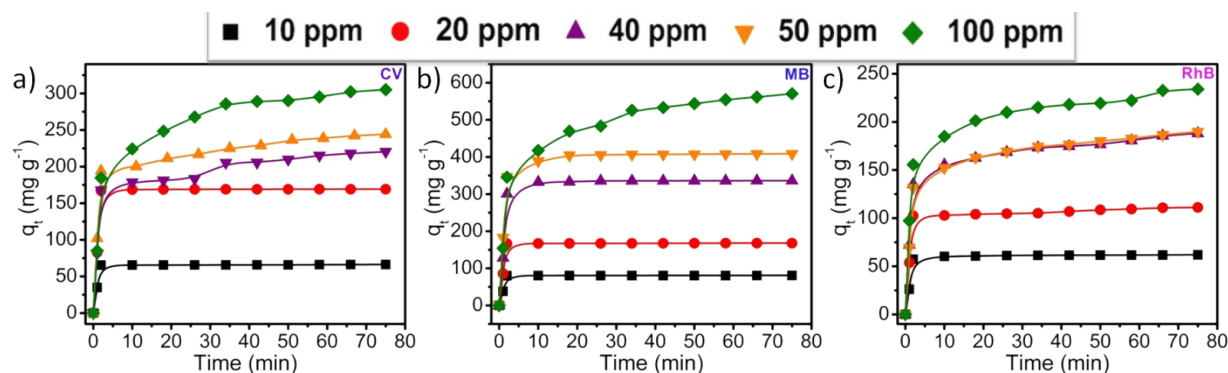

**Figure S1.** Plot of adsorption capacity ( $q_t$ ) vs time ( $t$ ) with different initial dyes concentrations 10, 20, 40, 50, 100 ppm; **(a)** CV; **(b)** MB; and **(c)** RhB (Dyes concentration (10-100) mg L<sup>-1</sup>; f-GA loading 0.16 mg mL<sup>-1</sup>).

**Table S3:** Comparative data table for the Pseudo first order and Pseudo second-order model.

| Dye | Conc. (ppm) | $q_e$ (experimental) (mg g <sup>-1</sup> ) | Pseudo-first order kinetics             |                            |       | Pseudo-second order kinetics            |                                               |       |
|-----|-------------|--------------------------------------------|-----------------------------------------|----------------------------|-------|-----------------------------------------|-----------------------------------------------|-------|
|     |             |                                            | $q_e$ (graphical) (mg g <sup>-1</sup> ) | $K_1$ (min <sup>-1</sup> ) | $R^2$ | $q_e$ (graphical) (mg g <sup>-1</sup> ) | $K_2$ (mg <sup>-1</sup> g min <sup>-1</sup> ) | $R^2$ |
|     |             |                                            |                                         |                            |       |                                         |                                               |       |

|            |     |        |        |        |        |        |        |        |
|------------|-----|--------|--------|--------|--------|--------|--------|--------|
| <b>CV</b>  | 10  | 66.21  | 5.73   | 0.0577 | 0.4833 | 66.40  | 0.0505 | 0.9999 |
|            | 20  | 168.19 | 9.43   | 0.0933 | 0.6213 | 169.78 | 0.0241 | 0.9998 |
|            | 40  | 242.36 | 113.33 | 0.0567 | 0.9163 | 245.10 | 0.0022 | 0.9974 |
|            | 50  | 218.07 | 110.87 | 0.0543 | 0.9108 | 221.73 | 0.0020 | 0.9955 |
|            | 100 | 302.29 | 168.42 | 0.0535 | 0.9353 | 309.60 | 0.0012 | 0.9969 |
| <b>MB</b>  | 10  | 81.03  | 5.61   | 0.0556 | 0.3986 | 81.23  | 0.0408 | 0.9999 |
|            | 20  | 167.87 | 15.22  | 0.0966 | 0.6997 | 168.63 | 0.0228 | 0.9999 |
|            | 40  | 336.21 | 58.15  | 0.1193 | 0.8359 | 338.98 | 0.0065 | 0.9997 |
|            | 50  | 408.44 | 99.57  | 0.1022 | 0.8776 | 411.52 | 0.0050 | 0.9999 |
|            | 100 | 570.31 | 347.29 | 0.0547 | 0.9601 | 578.03 | 0.0006 | 0.9967 |
| <b>RhB</b> | 10  | 61.93  | 10.54  | 0.0682 | 0.7158 | 62.23  | 0.0334 | 0.9998 |
|            | 20  | 111.14 | 32.32  | 0.0573 | 0.7623 | 111.23 | 0.0097 | 0.9993 |
|            | 40  | 187.98 | 87.38  | 0.0486 | 0.8711 | 187.62 | 0.0029 | 0.9977 |
|            | 50  | 189.86 | 92.20  | 0.0489 | 0.9065 | 190.11 | 0.0027 | 0.9978 |
|            | 100 | 234.01 | 123.96 | 0.0539 | 0.8396 | 233.64 | 0.0022 | 0.9972 |

**Table S4:** Parameters of Intra Particle Diffusion (IPD) model at different concentrations.

| Dye        | Conc. (ppm) | $k_1$<br>( $\text{mg g}^{-1}\text{min}^{-1/2}$ ) | $R^2$  | $k_2$<br>( $\text{mg g}^{-1}\text{min}^{-1/2}$ ) | $c_2$  | $R^2$  |
|------------|-------------|--------------------------------------------------|--------|--------------------------------------------------|--------|--------|
| <b>CV</b>  | 10          | 44.15                                            | 0.9247 | 0.11                                             | 65.13  | 0.8593 |
|            | 20          | 111.62                                           | 0.8875 | 0.25                                             | 167.43 | 0.8462 |
|            | 40          | 130.88                                           | 0.9167 | 7.69                                             | 179.08 | 0.9743 |
|            | 50          | 111.88                                           | 0.8788 | 8.05                                             | 152.32 | 0.9206 |
|            | 100         | 122.06                                           | 0.8467 | 17.43                                            | 170.28 | 0.9456 |
| <b>MB</b>  | 10          | 53.30                                            | 0.8644 | 0.09                                             | 80.04  | 0.8262 |
|            | 20          | 111.79                                           | 0.9069 | 0.20                                             | 166.14 | 0.9553 |
|            | 40          | 197.09                                           | 0.8023 | 3.53                                             | 311.42 | 0.8926 |
|            | 50          | 233.53                                           | 0.9183 | 6.77                                             | 360.09 | 0.9067 |
|            | 100         | 227.73                                           | 0.8284 | 30.82                                            | 322.76 | 0.9565 |
| <b>RhB</b> | 10          | 37.87                                            | 0.8414 | 0.52                                             | 57.87  | 0.7648 |
|            | 20          | 68.98                                            | 0.9157 | 1.34                                             | 98.88  | 0.895  |
|            | 40          | 91.27                                            | 0.9247 | 6.73                                             | 131.25 | 0.9625 |
|            | 50          | 88.68                                            | 0.9187 | 7.59                                             | 126.91 | 0.9637 |
|            | 100         | 107.68                                           | 0.9834 | 10.01                                            | 151.6  | 0.935  |

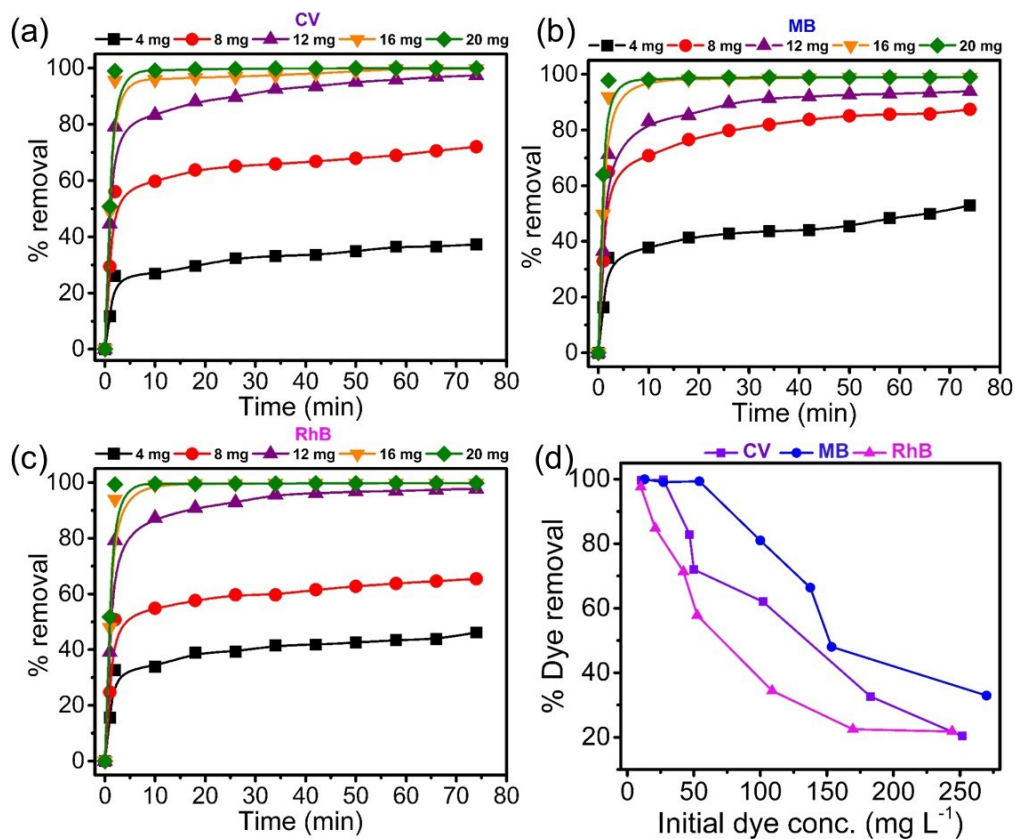

**Figure S2.** Effect of f-GA loading (4-20 mg/50 ml) on percentage removal of  $100 \text{ mg L}^{-1}$  (a) CV; (b) MB; (c) RhB; and (d) effect of varying initial concentration on % dye removal for 75 minutes (Dyes concentration ( $10\text{-}250 \text{ mg L}^{-1}$ ); f-GA loading  $0.16 \text{ mg mL}^{-1}$ ).
